# Supplementary material for: Feasibility and Utility of the Psoriasis Symptom Inventory (PSI) in Clinical Care Settings: A Study from the International Psoriasis Council
Source: PubMed Central journal article supplement — Am J Clin Dermatol. 2019 Jun 21;20(5):699–709. doi: 10.1007/s40257-019-00458-2 (PMC6764927; doi:10.1007/s40257-019-00458-2), 2019-06-21
Supplement: 40257_2019_458_MOESM1_ESM.pdf [file 40257_2019_458_MOESM1_ESM.pdf]

## **SUPPLEMENTAL MATERIALS**

### **Feasibility and Utility of the Psoriasis Symptom Inventory (PSI) in Clinical Care**

#### **Settings: A Study from the International Psoriasis Council**

B. Strober, P. van de Kerkhof, K. Callis Duffin, Y. Poulin, R.B. Warren,  
C. de La Cruz, J.M. van der Walt, B.S. Stolshek, M.L. Martin, A.V.E. de Carvalho

**American Journal of Clinical Dermatology, 2019**

**Supplemental Table S1.** Additional patient characteristics

|                                                                   | CT, USA<br>(n = 35)   | MO, USA<br>(n = 24)   | UT, USA<br>(n = 40)   | UK<br>(n = 35)       | Nether-<br>lands<br>(n = 35) | Brazil<br>(n = 35)   | Chile<br>(n = 35)    | Canada<br>(n = 39)   | All Patients<br>(N = 278) |
|-------------------------------------------------------------------|-----------------------|-----------------------|-----------------------|----------------------|------------------------------|----------------------|----------------------|----------------------|---------------------------|
| Education, mean highest completed grade (SD) [range] <sup>a</sup> |                       |                       |                       |                      |                              |                      |                      |                      |                           |
|                                                                   | 15.0 (2.8)<br>[11–20] | 14.3 (1.6)<br>[12–17] | 14.4 (2.6)<br>[10–20] | 12.7 (2.5)<br>[6–17] | 14.9 (2.6)<br>[8–20]         | 11.9 (3.8)<br>[4–17] | 15.7 (3.0)<br>[8–20] | 14.0 (2.4)<br>[9–19] | 14.1 (3.0)<br>[4–20]      |
| Marital status, n (%)                                             |                       |                       |                       |                      |                              |                      |                      |                      |                           |
| Married                                                           | 20 (57.1)             | 14 (58.3)             | 14 (35.0)             | 22 (62.9)            | 18 (54.5)                    | 24 (68.6)            | 21 (60.0)            | 25 (64.1)            | 158 (56.8)                |
| Widowed                                                           | 1 (2.9)               | 0                     | 0                     | 1 (2.9)              | 1 (3.0)                      | 5 (14.3)             | 2 (5.7)              | 2 (5.1)              | 12 (4.3)                  |
| Separated                                                         | 1 (2.9)               | 1 (4.2)               | 0                     | 0                    | 0                            | 0                    | 1 (2.9)              | 4 (10.3)             | 7 (2.5)                   |
| Divorced                                                          | 5 (14.3)              | 3 (12.5)              | 9 (22.5)              | 2 (5.7)              | 4 (12.1)                     | 1 (2.9)              | 0                    | 3 (7.7)              | 29 (10.4)                 |
| Never married                                                     | 8 (22.9)              | 6 (25.0)              | 17 (42.5)             | 6 (17.1)             | 10 (30.3)                    | 5 (14.3)             | 11 (31.4)            | 5 (12.8)             | 68 (24.5)                 |
| Missing                                                           | 0                     | 0                     | 0                     | 4 (11.4)             | 0                            | 0                    | 0                    | 0                    | 4 (1.4)                   |
| Employment, n (%)                                                 |                       |                       |                       |                      |                              |                      |                      |                      |                           |
| Employed full-time                                                | 13 (37.1)             | 15 (62.5)             | 21 (52.5)             | 15 (42.9)            | 12 (34.3)                    | 7 (20.0)             | 20 (57.1)            | 20 (51.3)            | 123 (44.2)                |
| Employed part-time                                                | 2 (5.7)               | 2 (8.3)               | 7 (17.5)              | 6 (17.1)             | 9 (25.7)                     | 0                    | 0                    | 1 (2.6)              | 27 (9.7)                  |
| Self-employed                                                     | 4 (11.4)              | 2 (8.3)               | 2 (5.0)               | 0                    | 1 (2.9)                      | 8 (22.9)             | 8 (22.9)             | 1 (2.6)              | 26 (9.4)                  |
| Out of work                                                       | 6 (17.1)              | 0                     | 1 (2.5)               | 3 (8.6)              | 2 (5.7)                      | 1 (2.9)              | 0                    | 1 (2.6)              | 14 (5.1)                  |
| Homemaker                                                         | 0                     | 1 (4.2)               | 1 (2.5)               | 0                    | 1 (2.9)                      | 1 (2.9)              | 2 (5.7)              | 1 (2.6)              | 7 (2.5)                   |
| Student                                                           | 1 (2.9)               | 1 (4.2)               | 3 (7.5)               | 1 (2.9)              | 2 (5.7)                      | 1 (2.9)              | 1 (2.9)              | 1 (2.6)              | 11 (4.0)                  |
| Retired                                                           | 7 (20.0)              | 2 (8.3)               | 4 (10.0)              | 1 (2.9)              | 4 (11.4)                     | 12 (34.3)            | 2 (5.7)              | 13 (33.3)            | 45 (16.2)                 |
| Unable to work                                                    | 2 (5.7)               | 1 (4.2)               | 1 (2.5)               | 5 (14.3)             | 4 (11.4)                     | 5 (14.3)             | 2 (5.7)              | 1 (2.6)              | 21 (7.6)                  |

|         | CT, USA<br>(n = 35) | MO, USA<br>(n = 24) | UT, USA<br>(n = 40) | UK<br>(n = 35) | Nether-<br>lands<br>(n = 35) | Brazil<br>(n = 35) | Chile<br>(n = 35) | Canada<br>(n = 39) | All Patients<br>(N = 278) |
|---------|---------------------|---------------------|---------------------|----------------|------------------------------|--------------------|-------------------|--------------------|---------------------------|
| Missing | 0                   | 0                   | 0                   | 4 (11.4)       | 0                            | 0                  | 0                 | 0                  | 4 (1.4)                   |

<sup>a</sup>Up to 20 years of formal education was possible.
